# Supplementary material
Source: PubMed Central journal article supplement (PMC10359969)
Supplement: NIHMS1905128-supplement-Supplementary.pdf [file NIHMS1905128-supplement-Supplementary.pdf]

---

**Supplementary information**

---

**Advances in local therapy for glioblastoma  
– taking the fight to the tumour**

---

In the format provided by the  
authors and unedited

**Supplementary Tables | Current active trials regarding local therapy for glioblastoma**

**Supplementary Table 1 | Intraoperative treatment modalities**

| Category                | Treatment                                          | Study type | Glioma type         | Number of patients | Estimated study completion date | ClinicalTrials.gov identifier |
|-------------------------|----------------------------------------------------|------------|---------------------|--------------------|---------------------------------|-------------------------------|
| Localized thermotherapy | LITT + chemoradiation                              | Phase I    | Primary GBM         | 45                 | December 2020                   | NCT02970448                   |
|                         | LITT+ hypo-fractionated RT                         | Phase I    | Recurrent GBM       | 32                 | February 2023                   | NCT04181684                   |
|                         | LITT + lomustine                                   | Phase II   | Recurrent GBM or AA | 32                 | November 2021                   | NCT03022578                   |
|                         | LITT+ pre- and post-operative pembrolizumab        | Phase I/II | Recurrent GBM       | 34                 | January 2021                    | NCT03277638                   |
|                         | LITT + avelumab                                    | Phase I    | Recurrent GBM       | 30                 | February 2021                   | NCT03341806                   |
|                         | LITT + hypofractionated RT                         | Phase I    | Primary GBM         | 32                 | December 2025                   | NCT04699773                   |
|                         | MR-guided LITT                                     | Phase I    | Primary GBM         | 20                 | December 2021                   | NCT04596930                   |
| Photodynamic therapy    | Per-operative PDT with Gliolan                     | Phase I    | Primary GBM         | 10                 | May 2021                        | NCT03048240                   |
|                         | Biopsy followed by stereotactic PDT with Gliolan   | Phase II   | Recurrent GBM       | 106                | July 2025                       | NCT04469699                   |
|                         | Stereotactic PDT with Gliolan and PD-L 506         | Phase II   | Primary, IDHwt GBM  | 20                 | February 2026                   | NCT03897491                   |
|                         | Intraoperative PDT + Gliolan                       | Phase II   | Primary GBM         | 21                 | September 2024                  | NCT04391062                   |
|                         | Interstitial PDT with PDL506                       | Phase II   | Primary IDHwt GBM   | 20                 | November 2026                   | NCT03897491                   |
| Focused ultrasound      | Sonodynamic therapy with ExAblate system and 5-ALA | Phase I    | GBM                 | 5                  | December 2022                   | NCT04845919                   |
|                         | RT with FUS                                        | Phase I    | Recurrent GBM       | 8                  | January 2023                    | NCT04988750                   |

**Supplementary Table 2 | Local delivery of chemotherapeutic agents**

| Category                     | Treatment                                                                                      | Study type | Glioma type                               | Number of patients | Estimated study completion date | ClinicalTrials.gov identifier |
|------------------------------|------------------------------------------------------------------------------------------------|------------|-------------------------------------------|--------------------|---------------------------------|-------------------------------|
| Convection-enhanced delivery | Intratumoral topotecan via CED after biopsy                                                    | Phase I    | Recurrent WHO grade III or IV glioma      | 5                  | April 2022                      | NCT03927274                   |
|                              | Irinotecan liposome injection via CED                                                          | Phase I    | Paediatric DIPG, post-RT                  | 19                 | September 2021                  | NCT03086616                   |
|                              | MTX110 (panobinostat nanoparticle formulation) via CED                                         | Phase I    | Paediatric primary diffuse midline glioma | 9                  | February 2024                   | NCT04264143                   |
|                              | MTX110 (panobinostat nanoparticle formulation) via CED                                         | Phase I/II | DIPG post-RT                              | 24                 | March 2025                      | NCT03566199                   |
|                              | CED delivery of liposomal irinotecan                                                           | Phase I    | Recurrent HGG                             | 30                 | January 2022                    | NCT02022644                   |
| Intra-arterial delivery      | Superselective intra-arterial cerebral infusion of cetuximab and/or bevacizumab                | Phase I/II | Recurrent glioma, age <22 years           | 30                 | January 2025                    | NCT01884740                   |
|                              | Superselective intra-arterial cerebral infusion of cetuximab combined with hypofractionated RT | Phase II   | Recurrent HGG                             | 37                 | May 2022                        | NCT02800486                   |
|                              | Superselective intra-arterial cerebral infusion of TMZ                                         | Phase I    | Primary GBM and AA                        | 30                 | December 2020                   | NCT01180816                   |
|                              | Superselective intra-arterial cerebral infusion of cetuximab                                   | Phase I/II | Primary GBM                               | 33                 | June 2021                       | NCT02861898                   |
|                              | Repeated superselective intra-arterial cerebral infusion of bevacizumab                        | Phase I    | GBM                                       | 30                 | June 2022                       | NCT02285959                   |

|                        |                                                                         |            |                      |    |               |             |
|------------------------|-------------------------------------------------------------------------|------------|----------------------|----|---------------|-------------|
|                        | Repeated superselective intra-arterial cerebral infusion of bevacizumab | Phase I/II | Primary GBM          | 25 | January 2020  | NCT01811498 |
|                        | Repeated superselective intra-arterial cerebral infusion of bevacizumab | Phase I/II | Recurrent GBM and AA | 54 | October 2021  | NCT01269853 |
|                        | Intra-arterial carboplatin + RT                                         | Phase II   | Recurrent GBM        | 35 | July 2021     | NCT03672721 |
| Localized chemotherapy | SI-053 (TMZ) as a powder in resection cavity                            | Phase I    | Primary GBM          | 27 | May 2023      | NCT04967690 |
|                        | Cerebraca wafer + TMZ                                                   | Phase I/II | Recurrent GBM        | 36 | December 2022 | NCT03234595 |

**Supplementary Table 3 | Localized immunotherapy**

| Category                | Treatment                                                               | Study type | Glioma type                                       | Number of patients | Estimated study completion date | ClinicalTrials.gov identifier |
|-------------------------|-------------------------------------------------------------------------|------------|---------------------------------------------------|--------------------|---------------------------------|-------------------------------|
| Oncolytic viral therapy | Injection of D2C7-IT (immunotoxin) via CED                              | Phase I    | Recurrent HGG                                     | 115                | December 2022                   | NCT02303678                   |
|                         | Injection of D2C7-IT (immunotoxin) via CED with systemic Atezolizumab   | Phase I    | Recurrent GBM                                     | 18                 | January 2025                    | NCT04160494                   |
|                         | HSV G207 + single dose of RT                                            | Phase II   | Pediatric recurrent HGG                           | 30                 | October 2025                    | NCT04482933                   |
|                         | HSV G207 + single dose of RT                                            | Phase I    | Recurrent cerebellar brain tumours                | 15                 | September 2024                  | NCT03911388                   |
|                         | HSV G207 + single dose of RT                                            | Phase I    | Paediatric recurrent supratentorial brain tumours | 12                 | March 2022                      | NCT02457845                   |
|                         | Single dose of rQNestin34.5v.2 (HSV1 virus) + cyclophosphamide          | Phase I    | Recurrent GBM                                     | 108                | July 2022                       | NCT03152318                   |
|                         | PVSRIPO delivered via CED                                               | Phase I    | Paediatric recurrent HGG                          | 12                 | March 2022                      | NCT03043391                   |
|                         | PVSRIPO delivered via CED                                               | Phase II   | Recurrent HGG                                     | 122                | December 2023                   | NCT02986178                   |
|                         | PVSRIPO delivered via CED                                               | Phase I    | Recurrent GBM                                     | 61                 | June 2021                       | NCT01491893                   |
|                         | Single injection of PVSRIPO with pembrolizumab                          | Phase II   | Recurrent GBM                                     | 30                 | March 2023                      | NCT04479241                   |
|                         | Intratumoral injection of genetically engineered HSV-1 expressing IL-12 | Phase II   | Recurrent HGG                                     | 36                 | September 2023                  | NCT02062827                   |

|                    |                                                                                              |            |                                |    |               |             |
|--------------------|----------------------------------------------------------------------------------------------|------------|--------------------------------|----|---------------|-------------|
|                    | Intra-arterial injection of Mesenchymal stem cells loaded with oncolytic adenovirus DNX-2401 | Phase I    | Recurrent HGG                  | 36 | February 2020 | NCT03896568 |
|                    | Intratumoral injection of DNX-2401 combined with pembrolizumab                               | Phase II   | Recurrent GBM or gliosarcoma   | 49 | June 2021     | NCT02798406 |
|                    | Intratumoral injection of DNX-2440                                                           | Phase I    | Recurrent GBM                  | 24 | October 2022  | NCT03714334 |
| Viral gene therapy | Intra tumoral HSV-tk, RT and TMZ                                                             | Phase I/II | Primary GBM                    | 62 | December 2025 | NCT03603405 |
|                    | Intra tumoral HSV-tk, Valacyclovir, RT, TMZ                                                  | Phase I/II | Recurrent GBM                  | 62 | December 2025 | NCT03596086 |
|                    | AdV-tk + valacyclovir + RT                                                                   | Phase I    | Paediatric brain tumors        | 12 | December 2021 | NCT00634231 |
|                    | Intra tumoral Ad-RTS-hIL-12 with Veledimex in combination with Nivolumab                     | Phase I    | Recurrent GBM                  | 21 | December 2021 | NCT03636477 |
|                    | Intra tumoral Ad-RTS-hIL-12 with Veledimex in combination with cemiplimab                    | Phase II   | Recurrent GBM                  | 36 | August 2022   | NCT04006119 |
|                    | Intra tumoral Ad-RTS-hIL-12 with Veledimex                                                   | Phase I    | Recurrent GBM                  | 36 | June 2021     | NCT03679754 |
|                    | Intra tumoral Ad-RTS-hIL-12 with Veledimex                                                   | Phase I    | Recurrent HGG                  | 48 | December 2019 | NCT02026271 |
|                    | Intra tumoral Ad-RTS-hIL-12 with Veledimex                                                   | Phase I/II | Paediatric brain tumours, DIPG | 45 | December 2024 | NCT03330197 |
|                    | Intra tumoral Ipilimumab + Intravenous Nivolumab following resection                         | Phase I    | Recurrent GBM                  | 6  | November 2023 | NCT03233152 |

|                               |                                                                  |         |               |    |               |             |
|-------------------------------|------------------------------------------------------------------|---------|---------------|----|---------------|-------------|
| Cytokine and antibody therapy | Injection of 124I-omburtamab via CED                             | Phase I | DIPG post-RT  | 64 | December 2020 | NCT01502917 |
|                               | Injection of OS2966 (anti-CD29) via CED                          | Phase I | Recurrent HGG | 24 | July 2023     | NCT04608812 |
|                               | Injection of anti-CD40 antibody (2141-V11) via CED               | Phase I | Recurrent HGG | 30 | December 2025 | NCT04547777 |
|                               | Injection of D2C7-IT via CED + atezolizumab                      | Phase I | Recurrent GBM | 18 | January 2026  | NCT04160494 |
|                               | Injection human recombinant bone morphogenetic protein 4 via CED | Phase I | Recurrent GBM | 15 | March 2021    | NCT02869243 |

**Supplementary Table 4 | Local radiotherapy**

| <b>Category</b> | <b>Treatment</b>                                               | <b>Study type</b> | <b>Glioma type</b> | <b>Number of patients</b> | <b>Estimated study completion date</b> | <b>ClinicalTrials.gov identifier</b> |
|-----------------|----------------------------------------------------------------|-------------------|--------------------|---------------------------|----------------------------------------|--------------------------------------|
| Brachytherapy   | <sup>186</sup> Re nanoliposomes delivered via CED              | Phase I/II        | Recurrent glioma   | 55                        | January 2025                           | NCT01906385                          |
|                 | <sup>125</sup> I brachytherapy and TMZ versus standard of care | Phase I           | Primary GBM        | 84                        | August 2023                            | NCT04856852                          |
|                 | Intraoperative radiotherapy                                    | Phase I           | Recurrent GBM      | 5                         | December 2024                          | NCT04763031                          |
|                 | Intraoperative radiotherapy and bevacizumab                    | Phase II          | Recurrent GBM      | 100                       | December 2026                          | NCT04681677                          |
|                 | Intraoperative radiotherapy in addition to TMZ                 | Phase III         | Primary GBM        | 314                       | March 2024                             | NCT02685605                          |



**Supplementary Table 5 | Cell therapy**

| Category          | Treatment                                                                     | Study type | Glioma type         | Number of patients | Estimated study completion date | ClinicalTrials.gov identifier |
|-------------------|-------------------------------------------------------------------------------|------------|---------------------|--------------------|---------------------------------|-------------------------------|
| Neural stem cells | Injection of genetically modified NSCs, flucytosine and leucovorin            | Phase I    | Recurrent HGG       | 18                 | June 2019                       | NCT02015819                   |
|                   | NSCs with oncolytic adenovirus (NSC-CRAAd-Survivin-pk7)                       | Phase I    | Primary GBM         | 13                 | December 2021                   | NCT03072134                   |
|                   | Injection of c-expressing allogeneic NSCs and irinotecan hydrochloride        | Phase I    | Recurrent HGG       | 53                 | July 2021                       | NCT02192359                   |
| T cell therapy    | Intraventricular and intratumoral injection of B7-H3 CAR-T cells              | Phase I    | Recurrent GBM       | 12                 | July 2022                       | NCT04385173                   |
|                   | Intraventricular and intratumoral injection of B7-H3 CAR-T cells              | Phase I/II | Recurrent GBM       | 40                 | July 2024                       | NCT04077866                   |
|                   | Intratumoral IL13R $\alpha$ 2-targeted CAR-T cells with checkpoint inhibition | Phase I    | Recurrent GBM       | 60                 | December 2022                   | NCT04003649                   |
|                   | Intracavity CD147-CAR-T cells via Ommaya reservoir                            | Phase I    | Recurrent GBM       | 31                 | May 2022                        | NCT04045847                   |
|                   | Intracavitary $\gamma\delta$ T cell therapy + TMZ                             | Phase I    | Primary GBM         | 12                 | January 2023                    | NCT04165941                   |
|                   | Intratumoral/cavitary HER2(EQ)BBZ/CD19t T cell injection                      | Phase 1    | Recurrent HGG       | 42                 | June 2021                       | NCT03389230                   |
|                   | Intraventricular injection of IL13R $\alpha$ 2-CAR-T cells                    | Phase I    | Leptomeningeal GBM, | 30                 | December 2022                   | NCT04661384                   |

|                 |                                                                                |         |                               |    |               |             |
|-----------------|--------------------------------------------------------------------------------|---------|-------------------------------|----|---------------|-------------|
|                 |                                                                                |         | ependymoma or medulloblastoma |    |               |             |
|                 | Intratumoral injection of IL13(EQ)BBzeta/CD19t+ TCM-enriched T cells           | Phase I | Recurrent GBM                 | 92 | January 2022  | NCT02208362 |
|                 | Intraventricular NKG2D CAR-T via Ommaya reservoir                              | Phase I | Recurrent GBM                 | 20 | December 2023 | NCT04717999 |
| NK cell therapy | Intracavitary injection of NK-92/5.28.z cells                                  | Phase I | Recurrent HER2-positive GBM   | 30 | December 2022 | NCT03383978 |
|                 | NK cells (CYNK-001) via Ommaya reservoir                                       | Phase I | Recurrent GBM                 | 30 | February 2024 | NCT04489420 |
|                 | Repeated intra tumoral engineered NK cells containing deleted TGFβR2 and NR3C1 | Phase I | Recurrent GBM                 | 25 | January 2024  | NCT04991870 |

5-ALA: 5-aminolevulinic acid, AA: anaplastic astrocytoma, CAR: chimaeric antigen receptor, CED, convection-enhanced delivery, DIPG: diffuse intrinsic pontine glioma, FUS: focused ultrasound, GBM: glioblastoma, HGG: high-grade glioma, IDHwt: isocitrate dehydrogenase wild type, LITT: laser interstitial thermal therapy, MR: magnetic resonance, NK: natural-killer, NSC: neural stem cell, PDT: photodynamic therapy, PVSRIPO: recombinant non-pathogenic polio-rhinovirus chimera, RT: radiotherapy, TMZ: temozolomide.
